# Supplementary material for: A N-doped NbOx nanoparticle electrocatalyst deposited on carbon black for oxygen reduction and evolution reactions in alkaline media
Source: Royal Society of Chemistry journal article supplement (doi:10.1039/d2ma00292b), 2022-01-01
Supplement: d2ma00292b1.pdf [file d2ma00292b1.pdf]

## Supporting Information

### **N-doped NbO<sub>x</sub> Nanoparticle Electrocatalyst Deposited on Carbon Black for Oxygen Reduction and Evolution Reactions in Alkaline Media**

Jeongsuk Seo<sup>1,\*</sup>, Won-Jin Moon<sup>2</sup>, Wan-Gil Jung<sup>2</sup>, and Jun-Woo Park<sup>3</sup>

<sup>1</sup> Department of Chemistry, College of Natural Sciences, Chonnam National University, 77 Yongbong-ro, Buk-gu, Gwangju 61186, Republic of Korea;

<sup>2</sup> Korea Basic Science Institute, Gwangju Center, 77 Yongbong-ro, Buk-gu, Gwangju 61186, Republic of Korea;

<sup>3</sup> Next-Generation Battery Research Center, Korea Electrotechnology Research Institute, 12 Bulmosan-ro 10beon-gil, Seongsan-gu, Changwon-si, Gyeongsangnam-do 51543, Republic of Korea

\* *Corresponding author: j\_seo@chonnam.ac.kr*

Keywords: Bifunctional oxygen electrocatalyst, Water splitting, Nonplatinum catalyst, Niobium oxide, TaO<sub>x</sub> nanoparticles.

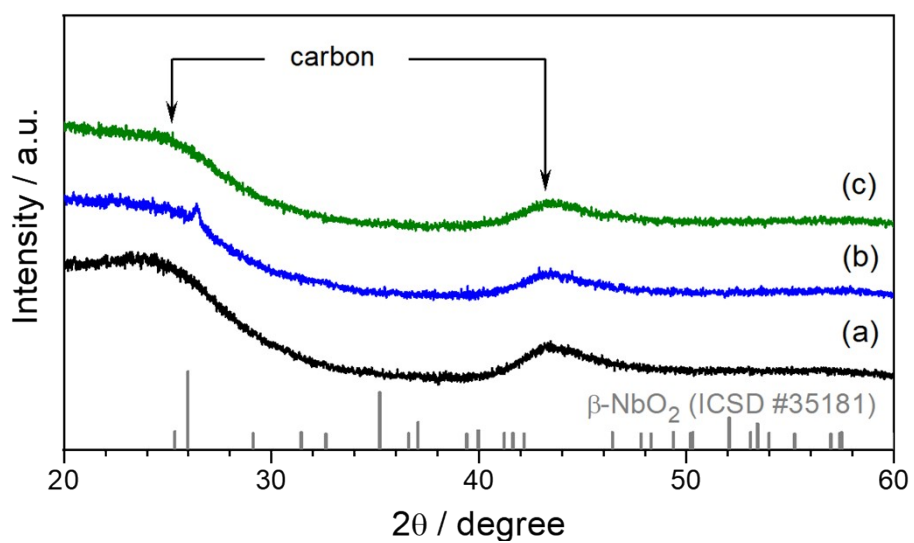

**Figure S1.** XRD patterns for NbO<sub>x</sub>/CB nanoparticles (a) as-deposited prepared by electrodeposition in a non-aqueous Nb-based solution and subsequently annealed in (b) Ar and (c) NH<sub>3</sub> flows at 873 K for 1 h.

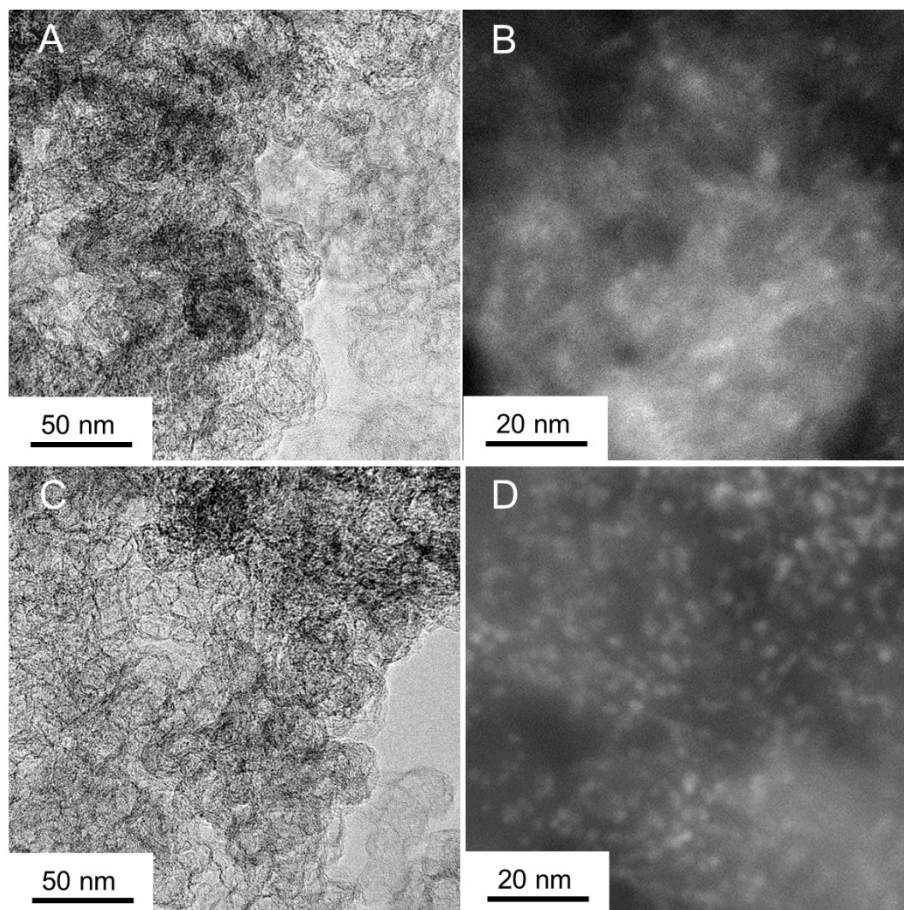

**Figure S2.** (A, C) TEM and (B, D) STEM images of the NbO<sub>x</sub>/CB nanoparticles, (A, B) as-prepared by electrodeposition and (C, D) subsequent annealing treatment in an Ar flow at 873 K for 1 h.

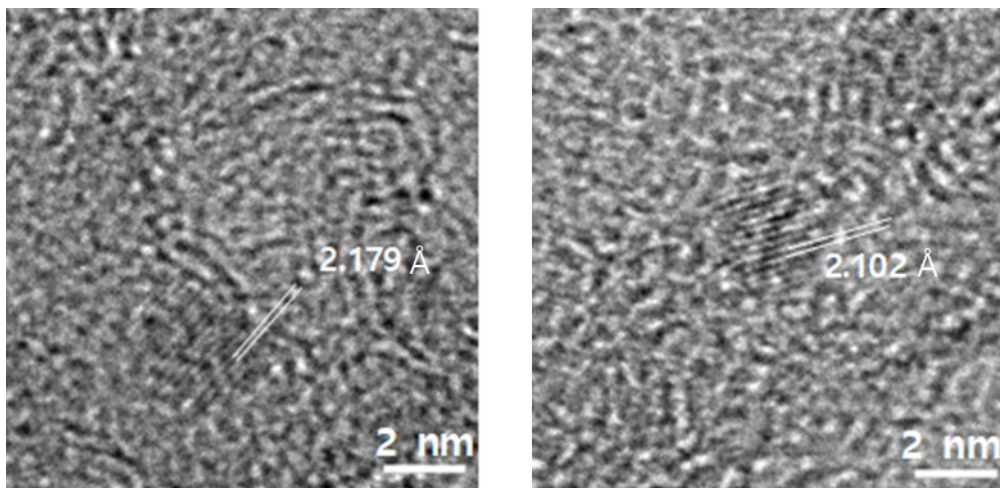

**Figure S3.** Magnified TEM images of the NbO<sub>x</sub> nanoparticles shown in Figure 1D, prepared by electrodeposition and subsequent annealing treatment in NH<sub>3</sub> flow at 873 K for 1 h.

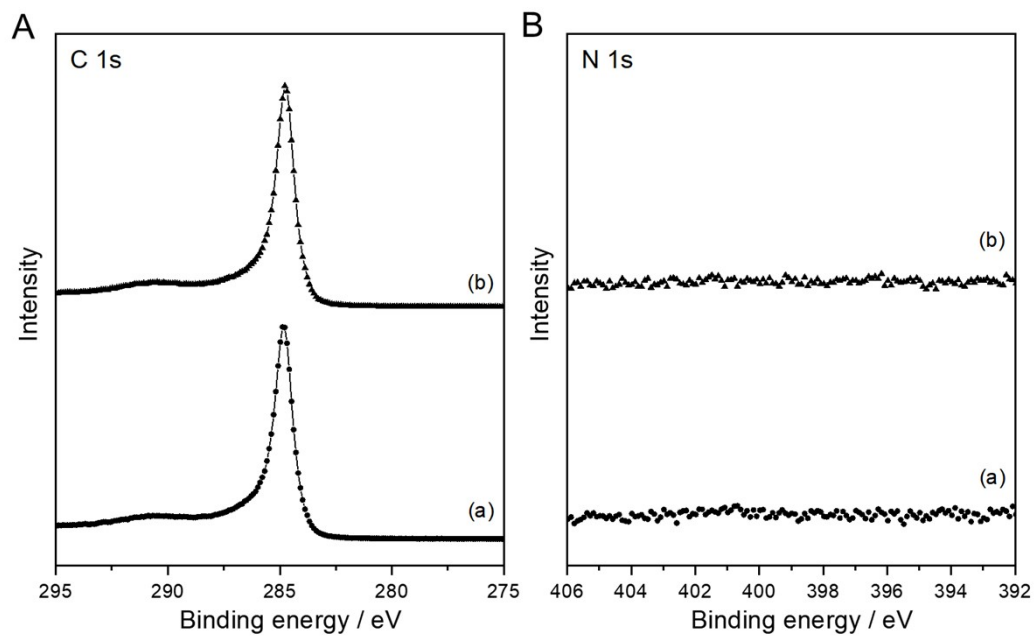

**Figure S4.** Narrow-scan (A) C 1s and (B) N 1s XPS spectra of CB particles (a) as-purchased and (b) annealed in NH<sub>3</sub> flow at 873 K for 1 h.

**Table S1.** Surface fractions of Nb species on NbO<sub>x</sub>/CB nanoparticles (a) as-deposited and subsequently annealed in (b) Ar and (c) NH<sub>3</sub> flows at 873 K for 1 h, respectively, which were estimated based on the narrow-scan Nb 3d XPS spectra in Figure 2.

| Condition                       | Fractions of surface Nb species       |                                       |
|---------------------------------|---------------------------------------|---------------------------------------|
|                                 | Nb <sup>5+</sup> /Nb <sub>total</sub> | Nb <sup>4+</sup> /Nb <sub>total</sub> |
| (a) as-deposited                | 0.74                                  | 0.26                                  |
| (b) annealed in Ar              | 0.77                                  | 0.23                                  |
| (d) annealed in NH <sub>3</sub> | 0.84                                  | 0.16                                  |

**Table S2.** Fitting results, namely, resistances and constant phase element (CPE) values, of Nyquist plots of the NbO<sub>x</sub>/CB nanoparticles series annealed in (a) NH<sub>3</sub> and (b) Ar flows at 873 K for 1 h, respectively, and (c) as-deposited, shown in Figure 5(B). The equivalent circuit model for best-fits of Nyquist plots was presented in the inset of the Figure 5(B). The EIS measurements were performed in the O<sub>2</sub>-purged 0.1 M KOH aqueous solutions at the applied potential of 0.72 V<sub>RHE</sub>. The EIS data were acquired in the frequency range from 10<sup>4</sup> to 10<sup>-1</sup> Hz at an AC amplitude of 10 mV.

|                                 | $R_s$<br>[ $\Omega$ ] | CPE-P; $n$ | CPE-T; $Q$<br>[ $\Omega^{-1}s^n$ ] | $R_{ct}$<br>[ $\Omega$ ] |
|---------------------------------|-----------------------|------------|------------------------------------|--------------------------|
| (a) annealed in NH <sub>3</sub> | 39.6                  | 0.89       | $8.0 \times 10^{-4}$               | 241.0                    |
| (b) annealed in Ar              | 42.5                  | 0.89       | $7.7 \times 10^{-4}$               | 321.6                    |
| (c) as-deposited                | 38.8                  | 0.93       | $6.0 \times 10^{-4}$               | 812.2                    |

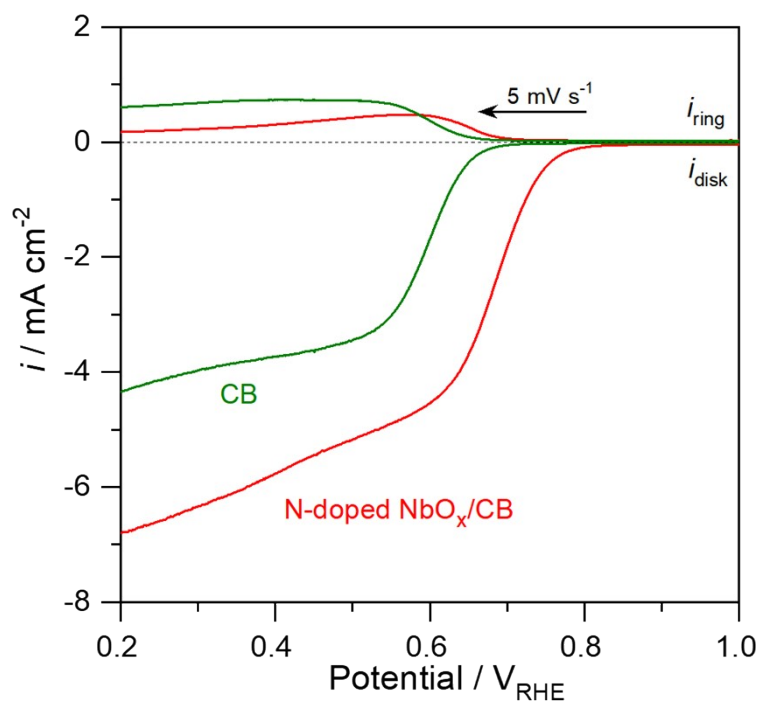

**Figure S5.** LSVs of the RRDE measurements for ORR over the prepared N-doped  $\text{NbO}_x/\text{CB}$  and CB catalysts in a  $\text{O}_2$ -purged 0.1 M KOH aqueous solution at a revolution rate of 1600 rpm and a scan rate of  $5 \text{ mV s}^{-1}$ . A constant potential of  $1.2 \text{ V}_{\text{RHE}}$  was applied to a Pt ring electrode. The  $\text{H}_2\text{O}_2$  formation was estimated from the ring current.



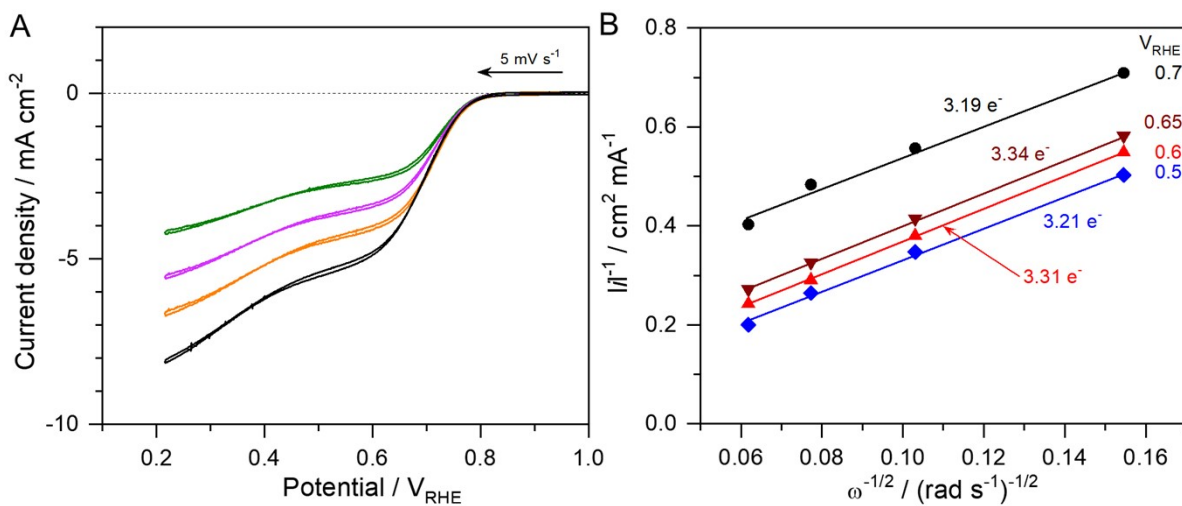

**Figure S6.** CVs of the prepared N-doped NbO<sub>x</sub>/CB in a O<sub>2</sub>-purged 0.1 M KOH aqueous solution at a scan rate of 5 mV s<sup>-1</sup>, obtained by varying rotation speeds of 400, 900, 1600, and 2500 rpm. (B) Koutecky-Levich plots,  $|i|^{-1}$  versus  $\omega^{-1/2}$ , of N-doped NbO<sub>x</sub>/CB nanoparticles, which were calculated from the LSVs in (A). The electron transfer numbers derived from the slopes were provided for each potential.
